# Supplementary material for: Data-driven identification of post-acute SARS-CoV-2 infection subphenotypes
Source: Springer Nature journal article supplement (doi:10.1038/s41591-022-02116-3), 2022-12-01
Supplement: MOESM1 [file 41591_2022_2116_MOESM1_ESM.pdf]

---

# Data-driven identification of post-acute SARS-CoV-2 infection subphenotypes

---

In the format provided by the  
authors and unedited

## Table-of-contents

|                             |   |
|-----------------------------|---|
| Supplementary Figure 1..... | 1 |
| Supplementary Figure 2..... | 2 |
| Supplementary Figure 3..... | 3 |

**Subphenotype 1**  
(Cardiac and Renal)  
N=7,047

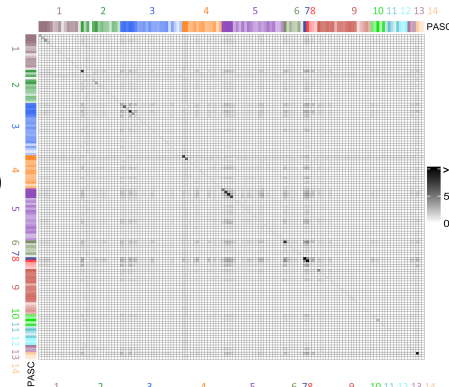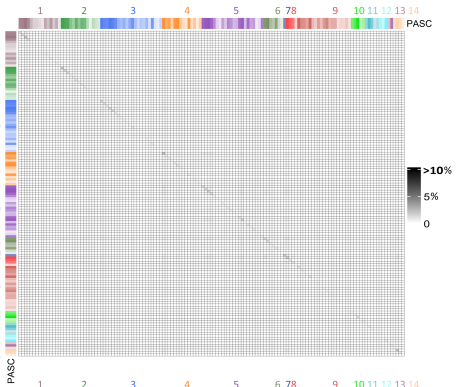

**Subphenotype 2**  
(Respiratory, Sleep  
and Anxiety)  
N=6,838

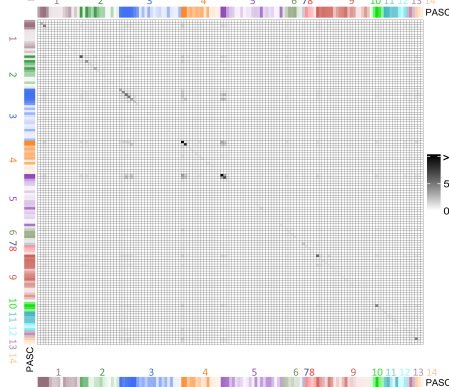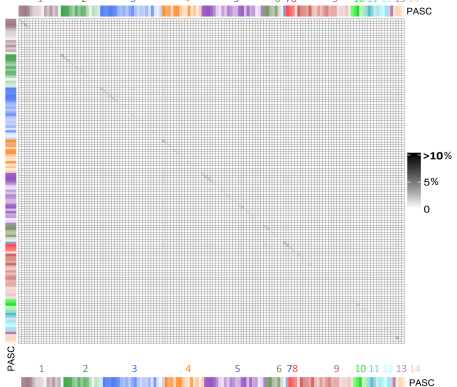

**Subphenotype 3**  
(Musculoskeletal  
and Nervous)  
N=4,879

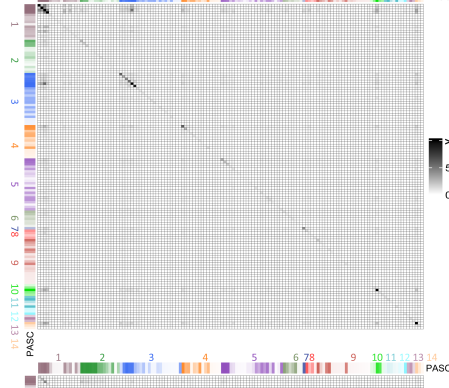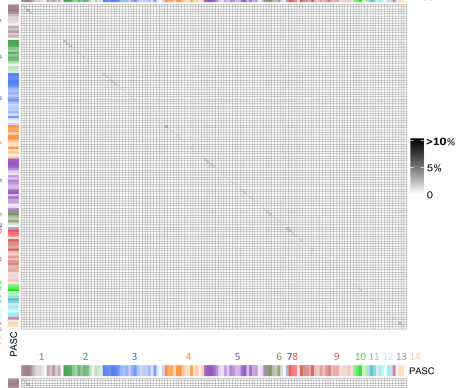

**Subphenotype 4**  
(Digestive and  
Respiratory)  
N=2,117

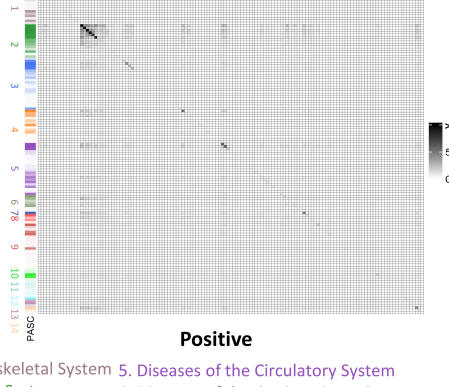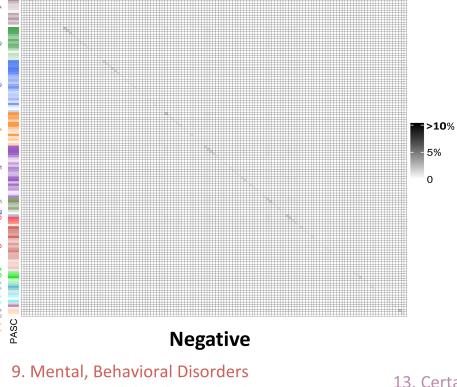

**Positive**

**Negative**

1: Diseases of the Musculoskeletal System 5: Diseases of the Circulatory System 9: Mental, Behavioral Disorders 13: Certain Infectious and Parasitic Diseases  
2: Diseases of the Digestive System 6: Diseases of the Genitourinary System 10: Diseases of the Skin and Subcutaneous Tissue 14: General and others  
3: Diseases of the Nervous System 7: Diseases of the Blood 11: Diseases of the Ear and Mastoid Process  
4: Diseases of the Respiratory System 8: Endocrine, Nutritional and Metabolic Diseases 12: Injury, Poisoning

**Supplementary Figure 1.** Difference of the incidence patterns of all PASC conditions on the INSIGHT cohort (extension of Figure 4). The order of PASC follows the one provided in the page “137 PASC list” in the Supplementary Table 2.

a. PASC topics learned based on the selective 44 PASC

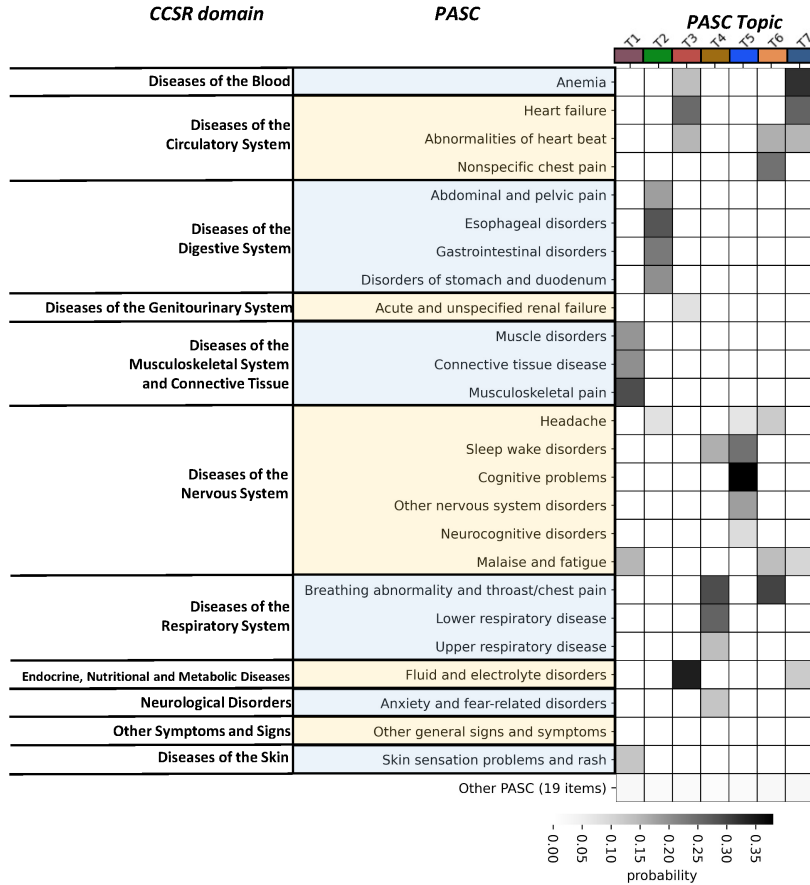

b. Select the optimal number of topics

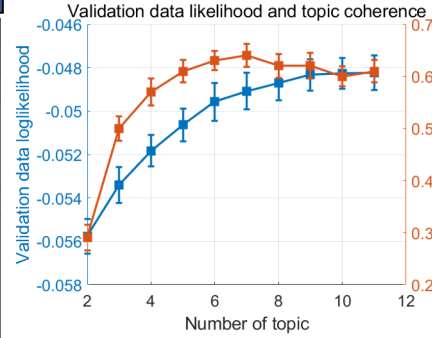

c. Distribution of topics on each subphenotype

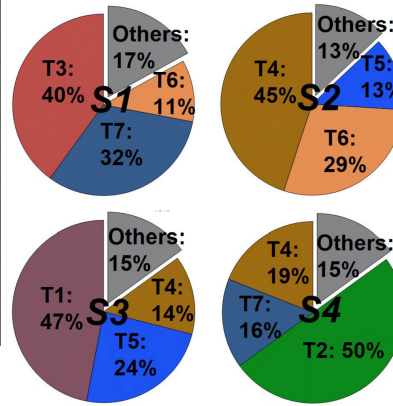

d. Overlap matrix of the subphenotypes (number of patients)

Subphenotypes by 44 PASC

|    | S1   | S2   | S3   | S4   |
|----|------|------|------|------|
| S1 | 6493 | 267  | 162  | 125  |
| S2 | 326  | 6170 | 249  | 93   |
| S3 | 104  | 206  | 4430 | 139  |
| S4 | 24   | 60   | 44   | 1989 |

Subphenotypes by 137 PASC

e. Similarities of topic learned from 137 and 44 PASC

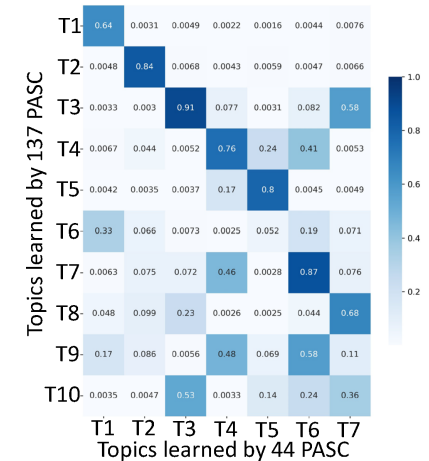

**Supplementary Figure 2.** We learned topics and derived subphenotypes based on the 44 selective PASC in the INSIGHT cohort. (a) shows seven topics learned based on the 44 selective PASC. (b) shows the procedure of selection optimal number of topics, where the error bar is obtained based on 5-fold cross-validation ( $n_{\text{training}}=16705$ ,  $n_{\text{validation}}=4176$ ), and data are presented as mean values  $\pm$  SD. (c) shows the distributions of mean topic proportions on each subphenotype. (c) shows the mean topic proportions on each subphenotype; (d) shows the overlap matrix of subphenotypes, where the number in  $i$ -th row  $j$ -th column denotes the number of patients who belongs to the  $i$ -th subphenotype derived by 137 PASC but belongs to the  $j$ -th subphenotype derived by 44 PASC. (d) shows the similarities of topics learned from 137 PASC and 44 PASC.



**Subphenotype 1  
(Cardiac and Renal)  
N=3,490**

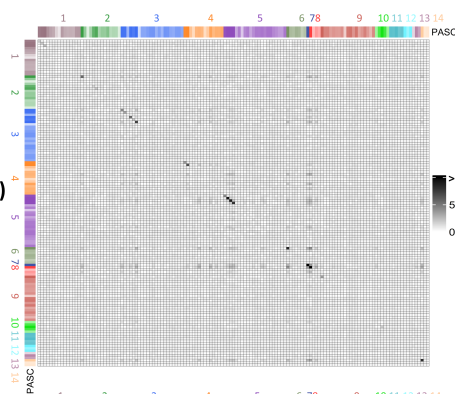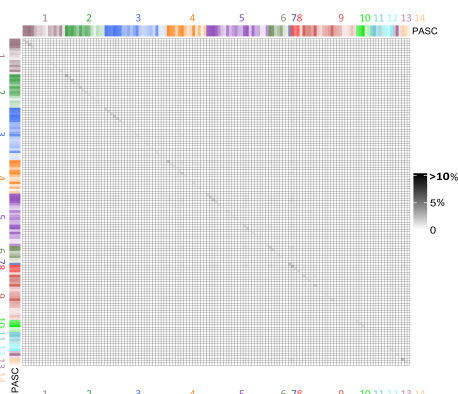

**Subphenotype 2  
(Respiratory, Sleep  
and Anxiety)  
N=5,281**

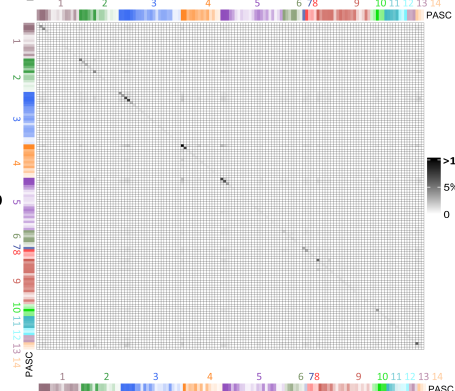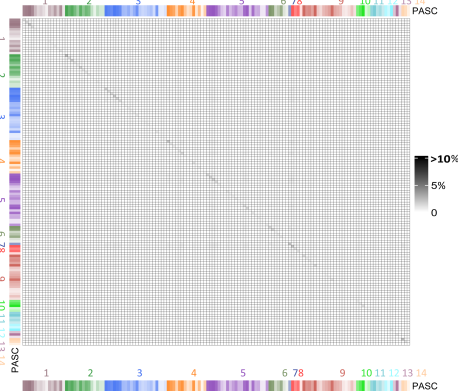

**Subphenotype 3  
(Musculoskeletal  
and Nervous)  
N=3,205**

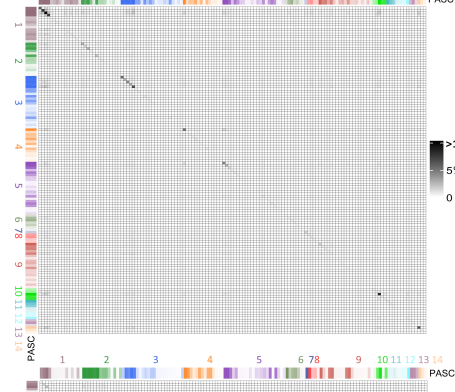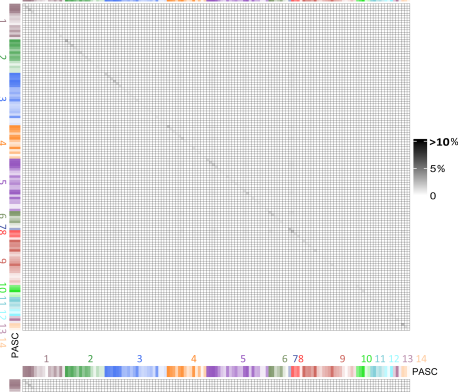

**Subphenotype 4  
(Digestive and  
Respiratory)  
N=1,748**

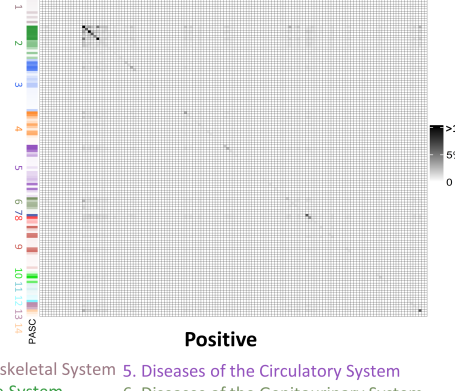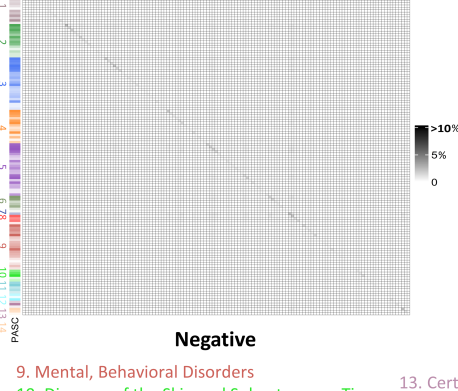

**Positive**

**Negative**

- |                                           |                                                  |                                                  |                                               |
|-------------------------------------------|--------------------------------------------------|--------------------------------------------------|-----------------------------------------------|
| 1: Diseases of the Musculoskeletal System | 5. Diseases of the Circulatory System            | 9. Mental, Behavioral Disorders                  | 13. Certain Infectious and Parasitic Diseases |
| 2: Diseases of the Digestive System       | 6. Diseases of the Genitourinary System          | 10. Diseases of the Skin and Subcutaneous Tissue | 14. General and others                        |
| 3: Diseases of the Nervous System         | 7. Diseases of the Blood                         | 11. Diseases of the Ear and Mastoid Process      |                                               |
| 4. Diseases of the Respiratory System     | 8. Endocrine, Nutritional and Metabolic Diseases | 12. Injury, Poisoning                            |                                               |

**Supplementary Figure 3.** Difference of the incidence patterns of all PASC conditions on the OneFlorida+ cohort (extension of Extended Data Figure 8). The order of PASC follows the one provided in the page “137 PASC list” in the Supplementary Table 2.
